# Supplementary material for: DNA Barcoding and Species Classification of Morchella
Source: MDPI journal article supplement (doi:10.3390/genes13101806), 2022-10-06
Supplement: s1 [file s1]

**Table S1.** The information of single DNA molecular barcoding sequences within *Morchella* genus

| Species                           | Source                             | Sequences                      |             |             |            |
|-----------------------------------|------------------------------------|--------------------------------|-------------|-------------|------------|
|                                   |                                    | <i>EF1-<math>\alpha</math></i> | <i>RPB1</i> | <i>RPB2</i> | <i>ITS</i> |
| <i>Mel</i> -13 M106               | Xinjiang, China                    | MK965432                       | MK965479    | MK965502    | MK965444   |
| <i>Mel</i> -13 M111               | Xinjiang, China                    | MK965421                       | MK965468    | MK965491    | MK965445   |
| <i>Mel</i> -13 M117               | Xinjiang, China                    | MK965428                       | MK965475    | MK965498    | MK965446   |
| <i>Mel</i> -13 M15                | Xinjiang, China                    | MK965414                       | MK965461    | MK965484    | MK965437   |
| <i>Mel</i> -13 M151               | Xinjiang, China                    | MK965423                       | MK965470    | MK965493    | MK965449   |
| <i>Mel</i> -13 M188               | Xinjiang, China                    | MK965425                       | MK965472    | MK965495    | MK965450   |
| <i>Mel</i> -13 M193               | Xinjiang, China                    | MK965426                       | MK965473    | MK965496    | MK965451   |
| <i>Mel</i> -13 M58                | Xinjiang, China                    | MK965429                       | MK965476    | MK965499    | MK965447   |
| <i>Mel</i> -19 M59                | Xinjiang, China                    | MK965431                       | MK965478    | MK965501    | MK965454   |
| <i>Mel</i> -19 M176               | Xinjiang, China                    | MK965424                       | MK965471    | MK965494    | MK965457   |
| <i>Mel</i> -19 M30                | Xinjiang, China                    | MK965416                       | MK965463    | MK965486    | MK965439   |
| <i>Mel</i> -19 M38                | Xinjiang, China                    | MK965417                       | MK965464    | MK965487    | MK965440   |
| <i>Mel</i> -19 M72                | Xinjiang, China                    | MK965419_                      | MK965466    | MK965489    | MK965442   |
| <i>Mel</i> -19 M74                | Xinjiang, China                    | MK965420                       | MK965467    | MK965490    | MK965443   |
| <i>Mel</i> -31 M192               | Xinjiang, China                    | MK965430                       | MK965477    | MK965500    | MK965452   |
| <i>Mel</i> -33 M144               | Xinjiang, China                    | MK965422_                      | MK965469    | MK965492    | MK965448   |
| <i>Mel</i> -33 M197               | Xinjiang, China                    | MK965427                       | MK965474    | MK965497    | MK965456   |
| <i>Mel</i> -33 M25                | Xinjiang, China                    | MK965415                       | MK965462    | MK965485    | MK965438   |
| <i>Mel</i> -33 M68                | Xinjiang, China                    | MK965418                       | MK965465    | MK965488    | MK965441   |
| <i>M.eximoides</i> OW-Mo2-17      | Norway Buskerud, Ringerike, Vagard | MK639459                       | MK639551    | MK639511    | MK629409   |
| <i>M. norvegiensis</i> ABO-Mo1-17 | Norway                             | MK639468                       | MK639560    | MK639520    | MK629419   |

|                                   |                                                    |          |          |           |          |
|-----------------------------------|----------------------------------------------------|----------|----------|-----------|----------|
| <i>M. norvegiensis</i> CRM-Mo1-17 | Norway                                             | MK639472 | MK639561 | MK639524  | MK629423 |
| <i>M. norvegiensis</i> LG-Mo1-17  | Norway                                             | MK639474 | MK639562 | MK639526  | MK629425 |
| <i>M. norvegiensis</i> IC-Mo1-17  | Norway                                             | MK639465 | MK639557 | MK639517  | MK629416 |
| <i>M. norvegiensis</i> IR-M1-15   | Norway                                             | MK639435 | MK639532 | MK639490  | MK629378 |
| <i>M. norvegiensis</i> JAS-Mo1-17 | Norway                                             | MK639460 | MK639552 | MK639512_ | MK629410 |
| <i>M. norvegiensis</i> JAS-Mo2-17 | Norway                                             | MK639461 | MK639553 | MK639513  | MK629411 |
| <i>M. norvegiensis</i> JAS-Mo3-17 | Norway                                             | MK639462 | MK629412 | MK639554  | MK639512 |
| <i>M. norvegiensis</i> MP-Mo-1-15 | Norway                                             | MK639431 | MK639530 | MK639488  | MK629374 |
| <i>M. norvegiensis</i> MP-Mo1-17  | Norway                                             | MK639467 | MK639559 | MK639519  | MK629418 |
| <i>M. norvegiensis</i> OK-Mo1-17  | Norway                                             | MK639466 | MK639558 | MK639518  | MK629417 |
| <i>M. norvegiensis</i> TJ-Mo1-15  | Norway                                             | MK639432 | MK639531 | MK639489  | MK629375 |
| <i>M. eximoides</i> LG-Mo1-17     | Norway Sor-Trondelag, Trondheim,<br>Charlottenlund | MK639463 | MK639555 | MK639515  | MK629413 |
| <i>M. importuna</i> EM-Mo1-17     | Norway: Ostfold, Fredrikstad                       | MK639464 | MK639556 | MK639516  | MK629415 |
| <i>M. clivicola</i> 1022          | Luoyang, Henan, China                              | MK321924 | MK321892 | MK321908  | MK321876 |
| <i>M. clivicola</i> 1021          | Luoyang, Henan, China                              | MK321919 | MK321887 | MK321903  | MK321871 |
| <i>M. clivicola</i> 1020          | Enshi, Hubei, China                                | MK321923 | MK321891 | MK321907  | MK321875 |
| <i>M. confusa</i> 1028            | Mianyang, Sichuan, China                           | MK321867 | MK321855 | MK321861  | MK321849 |
| <i>M. confusa</i> 1027            | Mianyang, Sichuan, China                           | MK321866 | MK321854 | MK321860  | MK321848 |
| <i>M. owneri</i> 1026             | Baoding, Hebei, China                              | MK321865 | MK321853 | MK321859  | MK321847 |
| <i>M. owneri</i> 1025             | Baoding, Hebei, China                              | MK321864 | MK321852 | MK321858  | MK321846 |
| <i>M. palazonii</i> 1032          | Yili, Xinjiang, China                              | MK321932 | MK321900 | MK321916  | MK321884 |
| <i>M. palazonii</i> 1031          | Yili, Xinjiang, China                              | MK321931 | MK321899 | MK321915  | MK321883 |
| <i>M. yangii</i> 1013             | Luoyang, Henan, China                              | MK321933 | MK321901 | MK321917  | MK321885 |
| <i>M. yangii</i> 1012             | Luoyang, Henan, China                              | MK321926 | MK321894 | MK321910  | MK321878 |

|                             |                        |          |          |          |          |
|-----------------------------|------------------------|----------|----------|----------|----------|
| <i>M. yangii</i> 1011       | Luoyang, Henan, China  | MK321922 | MK321890 | MK321906 | MK321874 |
| <i>M. yangii</i> 1014       | Nanyang, Henan, China  | MK321925 | MK321893 | MK321909 | MK321877 |
| <i>M. yishuica</i> 1017     | Linyi, Shandong, China | MK321930 | MK321898 | MK321914 | MK321882 |
| <i>M. yishuica</i> 1016     | Linyi, Shandong, China | MK321928 | MK321896 | MK321912 | MK321880 |
| <i>M. yishuica</i> 1015     | Linyi, Shandong, China | MK321929 | MK321897 | MK321913 | MK321881 |
| <i>M. yishuica</i> 1018     | Linyi, Shandong, China | MK321927 | MK321895 | MK321911 | MK321879 |
| <i>Mes</i> -15 YAASM32      | Sichuan, China         | MG589686 | MG598537 | MG598579 | MG589648 |
| <i>Mes</i> -15 YAASM8       | Yunnan, China          | MG589682 | MG598533 | MG598575 | MG589644 |
| <i>Mes</i> -15 YAASMNHSQ    | Yunnan, China          | MG589706 | MG598557 | MG598599 | MG589668 |
| <i>Mes</i> -15 YAASM34      | Yunnan, China          | MG589687 | MG598538 | MG598580 | MG589649 |
| <i>Mes</i> -16 YAASM76      | Yunnan, China          | MG589698 | MG598549 | MG598591 | MG589660 |
| <i>Mes</i> -16 YAASMDL1     | Yunnan, China          | MG589704 | MG598555 | MG598597 | MG589666 |
| <i>Mes</i> -16 YAASMDL2     | Yunnan, China          | MG589705 | MG598556 | MG598598 | MG589667 |
| <i>Mes</i> -19 YAASM42      | Sichuan, China         | MG589689 | MG598540 | MG598582 | MG589651 |
| <i>Mes</i> -20 YAASM56      | Hebei, China           | MG589695 | MG598546 | MG598588 | MG589657 |
| <i>Mes</i> -20 YAASM57      | Sichuan, China         | MG589696 | MG598547 | MG598589 | MG589658 |
| <i>Mes</i> -20 YAASM58      | Sichuan, China         | MG589697 | MG598548 | MG598590 | MG589659 |
| <i>Mes</i> -20 YAASMCB1     | Sichuan, China         | MG589703 | MG598554 | MG598596 | MG589665 |
| <i>Mes</i> -25 YAASM14      | Yunnan, China          | MG589683 | MG598534 | MG598576 | MG589645 |
| <i>Mes</i> -25 YAASM15      | Yunnan, China          | MG589684 | MG598535 | MG598577 | MG589646 |
| <i>Mes</i> -6 YAASM49       | Shanxi, China          | MG589692 | MG598543 | MG598585 | MG589654 |
| <i>Mes</i> -6 YAASM80       | Yunnan, China          | MG589700 | MG598551 | MG598593 | MG589662 |
| <i>Mes</i> -9 YAASM46       | Shandong, China        | MG589690 | MG598541 | MG598583 | MG589652 |
| <i>Mes</i> -9 YAASM47       | Shandong, China        | MG589691 | MG598542 | MG598584 | MG589653 |
| <i>M. importuna</i> Cly-158 | Sichuan, China         | MG121863 | MG121864 | MG121865 | MG121861 |

|                                |                          |          |          |          |          |
|--------------------------------|--------------------------|----------|----------|----------|----------|
| <i>M. gracilis</i> M686        | Parque Nacional El Avila | MH014704 | MH014715 | MH014718 | MH014707 |
| <i>M. gracilis</i> 9483 TJB    | Dominican Republic       | MH014703 | MH014714 | MH014717 | MH014706 |
| <i>M. kaibabensis</i> TAC 1708 | USA Arizona              | MH014722 | MH014733 | MH014738 | MH014728 |
| <i>M. kaibabensis</i> TAC 1376 | USA Arizona              | MH014721 | MH014732 | MH014737 | MH014727 |
| <i>M. palazonii</i> PhC149     | Spain                    | MH781723 | MH781725 | MH781726 | KT883899 |
| <i>M. exuberans</i> KOD1548    | Michigan                 | MF981032 | MF981028 | MF981030 | MF981025 |
| <i>M. exuberans</i> KOD1826    | Tennessee                | MF981031 | MF981027 | MF981029 | MF981026 |
| <i>Mel</i> -10 HKAS62868       | Yunnan, China            | JQ321842 | JQ321938 | JQ321970 | JQ321874 |
| <i>Mel</i> -10 HKAS62869       | Yunnan, China            | JQ321843 | JQ321939 | JQ321971 | JQ321875 |
| <i>Mel</i> -10 HKAS62870       | Germany                  | JQ321870 | JQ321966 | JQ321998 | JQ321902 |
| <i>Mel</i> -10 HKAS62871       | Germany                  | JQ321871 | JQ321967 | JQ321999 | JQ321903 |
| <i>Mel</i> -13 HKAS62887       | Yunnan, China            | JQ321841 | JQ321937 | JQ321969 | JQ321873 |
| <i>Mel</i> -13 HKAS62888       | Sichuan, China           | JQ321860 | JQ321956 | JQ321988 | JQ321892 |
| <i>Mel</i> -13 HKAS62889       | Sichuan, China           | JQ321852 | JQ321948 | JQ321980 | JQ321884 |
| <i>Mel</i> -13 HKAS62890       | Shanxi, China            | JQ321853 | JQ321949 | JQ321981 | JQ321885 |
| <i>Mel</i> -13 HKAS62891       | Xinjiang, China          | JQ321868 | JQ321964 | JQ321996 | JQ321900 |
| <i>Mel</i> -13 HKAS62892       | Shanxi, China            | JQ321854 | JQ321950 | JQ321982 | JQ321886 |
| <i>Mel</i> -13 HKAS62893       | Yunnan, China            | JQ321856 | JQ321952 | JQ321984 | JQ321888 |
| <i>Mel</i> -13 HKAS62894       | Shanxi, China            | JQ321872 | JQ321968 | JQ322000 | JQ321904 |
| <i>Mel</i> -14 HKAS62885       | Sichuan, China           | JQ321855 | JQ321951 | JQ321983 | JQ321887 |
| <i>Mel</i> -16 HKAS62883       | Jilin, China             | JQ321866 | JQ321962 | JQ321994 | JQ321898 |
| <i>Mel</i> -16 HKAS62884       | Jilin, China             | JQ321867 | JQ321963 | JQ321995 | JQ321899 |
| <i>Mel</i> -19 HKAS62873       | Gansu, China             | JQ321846 | JQ321942 | JQ321974 | JQ321878 |
| <i>Mel</i> -19 HKAS62875       | Sichuan, China           | JQ321858 | JQ321954 | JQ321986 | JQ321890 |
| <i>Mel</i> -20 HKAS62876       | Yunnan, China            | JQ321863 | JQ321959 | JQ321991 | JQ321895 |

|                         |                  |          |          |          |          |
|-------------------------|------------------|----------|----------|----------|----------|
| <i>Mel-21</i> HKAS62878 | Hubei, China     | JQ321862 | JQ321958 | JQ321990 | JQ321894 |
| <i>Mel-21</i> HKAS62879 | Sichuan, China   | JQ321851 | JQ321947 | JQ321979 | JQ321883 |
| <i>Mel-21</i> HKAS62880 | Sichuan, China   | JQ321850 | JQ321946 | JQ321978 | JQ321882 |
| <i>Mel-31</i> HKAS62881 | Gansu, China     | JQ321857 | JQ321953 | JQ321985 | JQ321889 |
| <i>Mel-31</i> HKAS62882 | Yunnan, China    | JQ321865 | JQ321961 | JQ321993 | JQ321897 |
| <i>Mel-33</i> HKAS62874 | Gansu, China     | JQ321861 | JQ321957 | JQ321989 | JQ321893 |
| <i>Mel-6</i> HKAS62872  | Yunnan, China    | JQ321845 | JQ321941 | JQ321973 | JQ321877 |
| <i>Mel-7</i> HKAS62863  | Yunnan, China    | JQ321869 | JQ321965 | JQ321997 | JQ321901 |
| <i>Mel-7</i> HKAS62864  | Yunnan, China    | JQ321844 | JQ321940 | JQ321972 | JQ321876 |
| <i>Mel-9</i> HKAS62865  | Yunnan, China    | JQ321847 | JQ321943 | JQ321975 | JQ321879 |
| <i>Mel-9</i> HKAS62866  | Yunnan, China    | JQ321848 | JQ321944 | JQ321976 | JQ321880 |
| <i>Mel-9</i> HKAS62867  | Yunnan, China    | JQ321849 | JQ321945 | JQ321977 | JQ321881 |
| <i>Mes-15</i> HKAS55894 | Sichuan, China   | JQ322011 | JQ322134 | JQ322175 | JQ322052 |
| <i>Mes-15</i> HKAS62913 | Yunnan, China    | JQ322005 | JQ322128 | JQ322169 | JQ322046 |
| <i>Mes-15</i> HKAS62914 | Yunnan, China    | JQ322006 | JQ322129 | JQ322170 | JQ322047 |
| <i>Mes-16</i> HAI-D-041 | Israel           | JQ322024 | JQ322147 | JQ322188 | JQ322065 |
| <i>Mes-16</i> HKAS55839 | Yunnan, China    | JQ322007 | JQ322130 | JQ322171 | JQ322048 |
| <i>Mes-16</i> HKAS55840 | Yunnan, China    | JQ322008 | JQ322131 | JQ322172 | JQ322049 |
| <i>Mes-19</i> HKAS55910 | Shaanxi, China   | JQ322037 | JQ322160 | JQ322201 | JQ322078 |
| <i>Mes-19</i> HKAS56568 | Chongqing, China | JQ322021 | JQ322144 | JQ322185 | JQ322062 |
| <i>Mes-20</i> HKAS55841 | Yunnan, China    | JQ322009 | JQ322132 | JQ322173 | JQ322050 |
| <i>Mes-20</i> HKAS55842 | Yunnan, China    | JQ322010 | JQ322133 | JQ322174 | JQ322051 |
| <i>Mes-21</i> HKAS55920 | Shannxi, China   | JQ322040 | JQ322163 | JQ322204 | JQ322081 |
| <i>Mes-21</i> HKAS55921 | Shannxi, China   | JQ322038 | JQ322161 | JQ322202 | JQ322079 |
| <i>Mes-22</i> HKAS55916 | Zhejiang, China  | JQ322016 | JQ322139 | JQ322180 | JQ322057 |

|                         |                     |          |          |          |          |
|-------------------------|---------------------|----------|----------|----------|----------|
| <i>Mes-22</i> HKAS55917 | Zhejiang, China     | JQ322017 | JQ322140 | JQ322181 | JQ322058 |
| <i>Mes-22</i> HKAS55919 | Zhejiang, China     | JQ322018 | JQ322141 | JQ322182 | JQ322059 |
| <i>Mes-23</i> HKAS56571 | Chongqing, China    | JQ322023 | JQ322146 | JQ322187 | JQ322064 |
| <i>Mes-23</i> HKAS62911 | Anhui, China        | JQ322001 | JQ322124 | JQ322165 | JQ322042 |
| <i>Mes-25</i> HKAS62861 | Sichuan, China      | JQ322035 | JQ322158 | JQ322199 | JQ322076 |
| <i>Mes-25</i> HKAS62862 | Sichuan, China      | JQ322036 | JQ322159 | JQ322200 | JQ322077 |
| <i>Mes-26</i> HKAS55912 | Hebei, China        | JQ322014 | JQ322137 | JQ322178 | JQ322055 |
| <i>Mes-26</i> HKAS55913 | Hebei, China        | JQ322015 | JQ322138 | JQ322179 | JQ322056 |
| <i>Mes-27</i> HKAS55896 | Sichuan, China      | JQ322012 | JQ322135 | JQ322176 | JQ322053 |
| <i>Mes-27</i> HKAS55897 | Sichuan, China      | JQ322013 | JQ322136 | JQ322177 | JQ322054 |
| <i>Mes-6</i> HKAS56601  | Shanxi, China       | JQ322003 | JQ322126 | JQ322167 | JQ322044 |
| <i>Mes-6</i> HKAS59162  | Liaoning, China     | JQ322031 | JQ322154 | JQ322195 | JQ322072 |
| <i>Mes-6</i> HKAS59163  | Liaoning, China     | JQ322032 | JQ322155 | JQ322196 | JQ322073 |
| <i>Mes-6</i> HMJAU5334  | Jilin, China        | JQ322041 | JQ322164 | JQ322205 | JQ322082 |
| <i>Mes-6</i> HMJAU5454  | Jilin, China        | JQ322019 | JQ322142 | JQ322183 | JQ322060 |
| <i>Mes-8</i> HKAS56676  | Heilongjiang, China | JQ322020 | JQ322143 | JQ322184 | JQ322061 |
| <i>Mes-8</i> HKAS59167  | Liaoning, China     | JQ322033 | JQ322156 | JQ322197 | JQ322074 |
| <i>Mes-8</i> HKAS59168  | Liaoning, China     | JQ322034 | JQ322157 | JQ322198 | JQ322075 |
| <i>Mes-9</i> HKAS59118  | Shandong, China     | JQ322025 | JQ322148 | JQ322189 | JQ322066 |
| <i>Mes-9</i> HKAS59121  | Shandong, China     | JQ322026 | JQ322149 | JQ322190 | JQ322067 |
| <i>Mes-9</i> HKAS59123  | Shandong, China     | JQ322027 | JQ322150 | JQ322191 | JQ322068 |
| <i>Mes-9</i> HKAS59124  | Shandong, China     | JQ322028 | JQ322151 | JQ322192 | JQ322069 |
| <i>Mes-9</i> HKAS59128  | Shandong, China     | JQ322029 | JQ322152 | JQ322193 | JQ322070 |
| <i>Mel-12</i> HT299     | CA-USA California   | JN085092 | JN085208 | JN085264 | JN085149 |
| <i>Mel-12</i> HT699     | OR-USA Oregon       | JN085104 | JN085220 | JN085276 | JN085161 |

|                         |                            |          |          |          |          |
|-------------------------|----------------------------|----------|----------|----------|----------|
| <i>Mel</i> -13 HT184    | India                      | JN085090 | JN085206 | JN085262 | JN085146 |
| <i>Mel</i> -13 HT424    | India                      | JN085101 | JN085217 | JN085273 | JN085158 |
| <i>Mel</i> -13 HT426    | Kars (Q) Eastern Anatolia  | JN085059 | JN085175 | JN085231 | JN085115 |
| <i>Mel</i> -13 HT815    | China                      | JN084947 | JN084999 | JN085052 | JN085167 |
| <i>Mel</i> -14 HT725    | China                      | JN085106 | JN085222 | JN085278 | JN085163 |
| <i>Mel</i> -14 HT728    | China                      | JN085107 | JN085223 | JN085279 | JN085164 |
| <i>Mel</i> -15 HT307    | VA-USA Virginia            | JN085095 | JN085211 | JN085267 | JN085152 |
| <i>Mel</i> -15 HT407    | OH-USA Ohio                | JN085094 | JN085210 | JN085266 | JN085151 |
| <i>Mel</i> -16 HT489    | Norway                     | JN085097 | JN085213 | JN085269 | JN085154 |
| <i>Mel</i> -16 M539     | Denmark                    | JN085102 | JN085218 | JN085274 | JN085159 |
| <i>Mel</i> -16 S F13634 | Sweden, Uppland            | JN085053 | JN085169 | JN085225 | JN085109 |
| <i>Mel</i> -16 S F60062 | Sweden, Södermanland       | JN085082 | JN085198 | JN085254 | JN085138 |
| <i>Mel</i> -19 M218     | Sweden                     | JN085088 | JN085204 | JN085260 | JN085144 |
| <i>Mel</i> -19 S F46072 | Sweden                     | JN085065 | JN085181 | JN085237 | JN085121 |
| <i>Mel</i> -19HT735     | China                      | JN085108 | JN085224 | JN085280 | JN085165 |
| <i>Mel</i> -19S_F99479  | Sweden                     | JN085083 | JN085199 | JN085255 | JN085139 |
| <i>Mel</i> -20 HT195    | Mugla Aegean               | JN085086 | JN085202 | JN085258 | JN085142 |
| <i>Mel</i> -20 HT214    | Sweden                     | JN085087 | JN085203 | JN085259 | JN085143 |
| <i>Mel</i> -20 HT297    | Konya (G) Central Anatolia | JN085055 | JN085171 | JN085227 | JN085111 |
| <i>Mel</i> -20 HT453    | Konya (G) Central Anatolia | JN085063 | JN085179 | JN085235 | JN085119 |
| <i>Mel</i> -20 HT814    | China                      | JN084946 | JN084998 | JN085051 | JN085166 |
| <i>Mel</i> -20HT456     | Konya (G) Central Anatolia | JN085064 | JN085180 | JN085236 | JN085120 |
| <i>Mel</i> -20HT474     | Taiwan                     | JN085098 | JN085214 | JN085270 | JN085155 |
| <i>Mel</i> -21 HT222    | Japan                      | JN085091 | JN085207 | JN085263 | JN085148 |
| <i>Mel</i> -21 M225     | Japan                      | JN085099 | JN085215 | JN085271 | JN085156 |

|                        |                                 |          |          |          |          |
|------------------------|---------------------------------|----------|----------|----------|----------|
| <i>Mel-22</i> HT431    | CA-USA California               | JN085093 | JN085209 | JN085265 | JN085150 |
| <i>Mel-22</i> HT839    | OR-USA Oregon                   | JN085105 | JN085221 | JN085277 | JN085162 |
| <i>Mel-23</i> M495     | Norway                          | JN085096 | JN085212 | JN085268 | JN085153 |
| <i>Mel-23</i> HT542    | Denmark                         | JN085103 | JN085219 | JN085275 | JN085160 |
| <i>Mel-25</i> HT436    | Yozgat Central Anatolia         | JN085061 | JN085177 | JN085233 | JN085117 |
| <i>Mel-25</i> HT488    | Çanakkale (A) Marmara           | JN085072 | JN085188 | JN085244 | JN085128 |
| <i>Mel-25</i> HT495    | Çanakkale (A) Marmara           | JN085073 | JN085189 | JN085245 | JN085129 |
| <i>Mel-25</i> HT539    | Mersin (H) Mediterranean        | JN085080 | JN085196 | JN085252 | JN085136 |
| <i>Mel-25</i> HT540    | Mersin (H) Mediterranean        | JN085081 | JN085197 | JN085253 | JN085137 |
| <i>Mel-26</i> HT508    | Yozgat (L) Central Anatolia     | JN085075 | JN085191 | JN085247 | JN085131 |
| <i>Mel-26</i> HT509    | Yozgat (L) Central Anatolia     | JN085076 | JN085192 | JN085248 | JN085132 |
| <i>Mel-26</i> S F27848 | Sweden                          | JN085054 | JN085170 | JN085226 | JN085110 |
| <i>Mel-27</i> HT448    | Konya (G) Central Anatolia      | JN085062 | JN085178 | JN085234 | JN085118 |
| <i>Mel-27</i> HT478    | Kayseri (K) Central Anatolia    | JN085070 | JN085186 | JN085242 | JN085126 |
| <i>Mel-27</i> HT511    | Kahramanmaraş Mediterranean     | JN085078 | JN085194 | JN085250 | JN085134 |
| <i>Mel-27</i> HT520    | Adana Mediterranean             | JN085079 | JN085195 | JN085251 | JN085135 |
| <i>Mel-28</i> HT401    | Yozgat (L) Central Anatolia     | JN085058 | JN085174 | JN085230 | JN085114 |
| <i>Mel-28</i> HT507    | Yozgat (L) Central Anatolia     | JN085074 | JN085190 | JN085246 | JN085130 |
| <i>Mel-28</i> HT510    | Yozgat (L) Central Anatolia     | JN085077 | JN085193 | JN085249 | JN085133 |
| <i>Mel-29</i> HT470    | Uşak (E) Aegean                 | JN085066 | JN085182 | JN085238 | JN085122 |
| <i>Mel-29</i> HT471    | Uşak (E) Aegean                 | JN085067 | JN085183 | JN085239 | JN085123 |
| <i>Mel-30</i> HT193    | Muğla (C) Aegean                | JN085085 | JN085201 | JN085257 | JN085141 |
| <i>Mel-31</i> HT354    | Black Sea Kastamonu             | JN085056 | JN085172 | JN085228 | JN085112 |
| <i>Mel-31</i> HT396    | Kahramanmaraş (J) Mediterranean | JN085057 | JN085173 | JN085229 | JN085113 |
| <i>Mel-31</i> HT472    | Uşak Mediterranean              | JN085068 | JN085184 | JN085240 | JN085124 |

|                      |                             |          |          |          |          |
|----------------------|-----------------------------|----------|----------|----------|----------|
| <i>Mel-32</i> HT106  | Kastamonu Black Sea         | JN085084 | JN085200 | JN085256 | JN085140 |
| <i>Mel-32</i> HT428  | Kars East Anatolian         | JN085060 | JN085176 | JN085232 | JN085116 |
| <i>Mel-32</i> HT477  | Kayseri Central Anatolia    | JN085069 | JN085185 | JN085241 | JN085125 |
| <i>Mel-32</i> HT479  | Kayseri Central Anatolia    | JN085071 | JN085187 | JN085243 | JN085127 |
| <i>Mel-20</i> HT 123 | Kastamonu Black Sea         | HM056315 | HM056413 | HM056475 | HM056376 |
| <i>Mel-20</i> HT 165 | Denizli Aegean              | HM056323 | HM056421 | HM056483 | HM056381 |
| <i>Mel-20</i> HT 168 | Denizli Aegean              | HM056325 | HM056423 | HM056485 | HM056382 |
| <i>Mel-20</i> HT 181 | Mediterranean               | HM056328 | HM056426 | HM056488 | HM056383 |
| <i>Mel-20</i> HT 182 | Adana Mediterranean         | HM056329 | HM056427 | HM056489 | HM056384 |
| <i>Mel-20</i> HT 183 | Mediterranean               | HM056330 | HM056428 | HM056490 | HM056385 |
| <i>Mel-20</i> HT 184 | Mediterranean               | HM056331 | HM056429 | HM056491 | HM056386 |
| <i>Mel-20</i> HT 187 | Mug̃la Aegean               | HM056332 | HM056430 | HM056492 | HM056387 |
| <i>Mel-20</i> HT 191 | Mugla Aegean                | HM056334 | HM056432 | HM056494 | HM056389 |
| <i>Mel-20</i> HT 195 | Mugla Aegean                | HM056336 | HM056434 | HM056496 | HM056391 |
| <i>Mel-20</i> HT 260 | Sivas (I) Central Anatolian | HM056359 | HM056457 | HM056519 | HM056399 |
| <i>Mel-20</i> HT 42  | Mediterranean               | HM056360 | HM056458 | HM056520 | HM056400 |
| <i>Mel-20</i> HT 46  | Mediterranean               | HM056362 | HM056460 | HM056522 | HM056402 |
| <i>Mel-20</i> HT 92  | Unknown                     | HM056367 | HM056465 | HM056527 | HM056406 |
| <i>Mel-25</i> HT 157 | Aydin Aegean                | HM056322 | HM056420 | HM056482 | HM056380 |
| <i>Mel-25</i> HT 188 | Mug̃la Aegean               | HM056333 | HM056431 | HM056493 | HM056388 |
| <i>Mel-25</i> HT 65  | Mug̃la Aegean               | HM056364 | HM056462 | HM056524 | HM056404 |
| <i>Mel-26</i> HT 120 | Kastamonu Black Sea         | HM056313 | HM056411 | HM056473 | HM056374 |
| <i>Mel-26</i> HT 122 | Kastamonu Black Sea         | HM056314 | HM056412 | HM056474 | HM056375 |
| <i>Mel-26</i> HT 124 | Kastamonu Black Sea         | HM056316 | HM056414 | HM056476 | HM056377 |
| <i>Mel-26</i> HT 156 | Aydin Aegean                | HM056321 | HM056419 | HM056481 | HM056379 |

|                                        |                                  |          |          |          |          |
|----------------------------------------|----------------------------------|----------|----------|----------|----------|
| <i>Mel</i> -27 HT 107                  | Kastamonu Black Sea              | HM056310 | HM056408 | HM056470 | HM056372 |
| <i>Mel</i> -27 HT 118                  | Kastamonu Black Sea              | HM056312 | HM056410 | HM056472 | HM056373 |
| <i>Mel</i> -27 HT 207                  | Kahramanmaras(G) Mediterranean   | HM056343 | HM056441 | HM056503 | HM056395 |
| <i>Mel</i> -27 HT 25                   | Mersin (E) Mediterranean         | HM056357 | HM056455 | HM056517 | HM056397 |
| <i>Mel</i> -29 HT 155                  | Aydın Agean                      | HM056320 | HM056418 | HM056480 | HM056378 |
| <i>Mel</i> -29 HT 45                   | Adana Mediterranean              | HM056361 | HM056459 | HM056521 | HM056401 |
| <i>Mel</i> -29 HT 82                   | Mersin (E) Mediterranean         | HM056365 | HM056463 | HM056525 | HM056405 |
| <i>Mel</i> -30 HT 193                  | Muğla (C) Agean                  | HM056335 | HM056433 | HM056495 | HM056390 |
| <i>Mel</i> -31 HT 202                  | Kahramanmaras Mediterranean      | HM056341 | HM056439 | HM056501 | HM056393 |
| <i>Mel</i> -31 HT 203                  | Kahramanmaras Mediterranean      | HM056342 | HM056440 | HM056502 | HM056394 |
| <i>Mel</i> -31 HT 212                  | Kahramanmaras Mediterranean      | HM056344 | HM056442 | HM056504 | HM056396 |
| <i>Mel</i> -8 HT 251                   | Unknown                          | HM056358 | HM056456 | HM056518 | HM056398 |
| <i>Mel</i> -8 HT 50                    | Unknown                          | HM056363 | HM056461 | HM056523 | HM056403 |
| <i>M. brunnea</i> Mel Dung 02-04       | Whitman County Washington        | KM204663 | KM204727 | KM204754 | KM204686 |
| <i>M. brunnea</i> 11-29-Dung           | Whitman County Washington        | KM204662 | KM204728 | KM204755 | KM204687 |
| <i>M. snyderi</i> MM 4                 | Latah County Idaho               | KM034930 | KM204724 | KM204750 | KM204682 |
| <i>M. snyderi</i> MM 2-1A              | Latah County Idaho               | KM034929 | KM204723 | KM204747 | KM204681 |
| <i>M. snyderi</i> 11-12-VM 1-4         | Latah County Idaho               | KM204763 | KM204726 | KM204748 | KM204678 |
| <i>M. snyderi</i> Umatilla Black 01-01 | Garfield County Washington       | KM034927 | KM204722 | KM204751 | KM204679 |
| <i>M. snyderi</i> Dung 04-03           | Garfield County Washington       | KM034926 | KM204721 | KM204752 | KM204683 |
| <i>M. snyderi</i> ARD 04-02            | Latah County Idaho               | KM034925 | KM204720 | KM204753 | KM204677 |
| <i>M. snyderi</i> 11-12-VM 1-2         | Latah County Idaho               | KM204764 | KM204766 | KM204767 | KM204768 |
| <i>M. snyderi</i> 11-12-VM 1-5         | Latah County Idaho               | KM034928 | KM204725 | KM204749 | KM204680 |
| <i>Mel</i> -37 CIEFAP5                 | Chubut:PNLA Senda arroyo Cascada | KJ569626 | KJ569594 | KJ569620 | KJ439678 |
| <i>Mel</i> -37 CIEFAP57                | Chubut:Trevelin, La 106 Farm     | KJ569627 | KJ569593 | KJ569621 | KJ439670 |

|                        |                                           |          |          |          |          |
|------------------------|-------------------------------------------|----------|----------|----------|----------|
| <i>Mel-37</i> CIEFAP69 | Chubut:Lago Puelo, Río Azul catwalk       | KJ569629 | KJ569595 | KJ569623 | KJ439677 |
| <i>Mel-37</i> CIEFAP71 | Chubut:Lago Puelo, Río Azul catwalk       | KJ569630 | KJ569596 | KJ569624 | KJ439673 |
| <i>Mel-37</i> CIEFAP74 | Chubut:Lago Puelo, Río Azul catwalk       | KJ569631 | KJ569598 | KJ569625 | KJ439674 |
| MKH3B                  | Marco River Forest<br>Farm, Qinghai,China |          |          |          |          |
| m111                   | Marco River Forest<br>Farm, Qinghai,China |          |          |          |          |
| M118                   | Marco River Forest<br>Farm, Qinghai,China |          |          |          |          |
| M148                   | Marco River Forest<br>Farm, Qinghai,China |          |          |          |          |
| M200                   | Marco River Forest<br>Farm, Qinghai,China |          |          |          |          |
| M34                    | Marco River Forest<br>Farm, Qinghai,China |          |          |          |          |
| M35                    | Marco River Forest<br>Farm, Qinghai,China |          |          |          |          |
| M69                    | Marco River Forest<br>Farm, Qinghai,China |          |          |          |          |
| M73                    | Marco River Forest<br>Farm, Qinghai,China |          |          |          |          |
| 10号                    | Xining,Qinghai,China                      |          |          |          |          |
| 14号                    | Xining,Qinghai,China                      |          |          |          |          |
| 16号                    | Xining,Qinghai.China                      |          |          |          |          |

The information of *Morchella* species, including species names, source and accession numbers

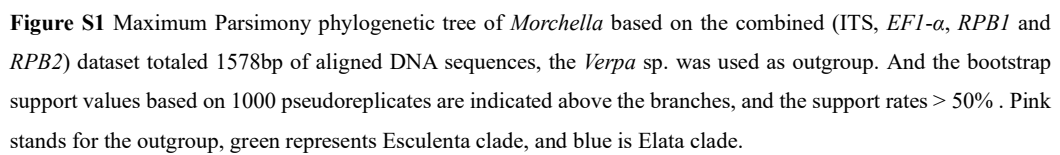

**Figure S1** Maximum Parsimony phylogenetic tree of *Morchella* based on the combined (ITS, *EF1- $\alpha$* , *RPB1* and *RPB2*) dataset totaled 1578bp of aligned DNA sequences, the *Verpa* sp. was used as outgroup. And the bootstrap support values based on 1000 pseudoreplicates are indicated above the branches, and the support rates > 50% . Pink stands for the outgroup, green represents Esculenta clade, and blue is Elata clade.

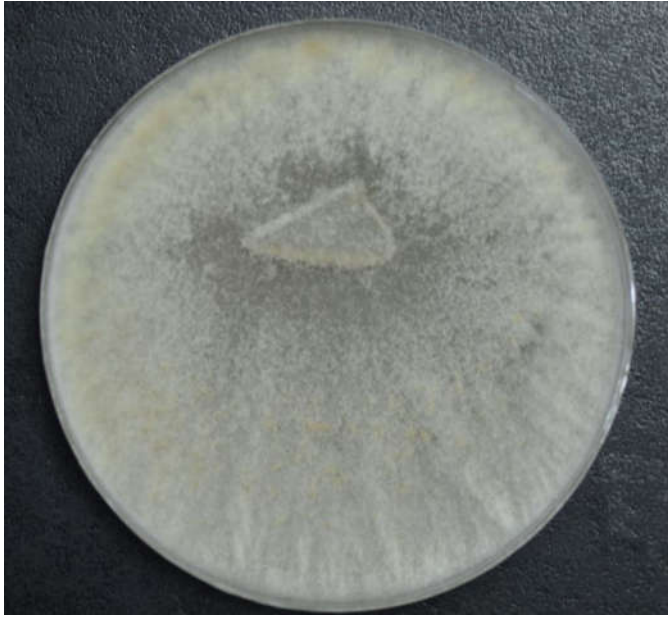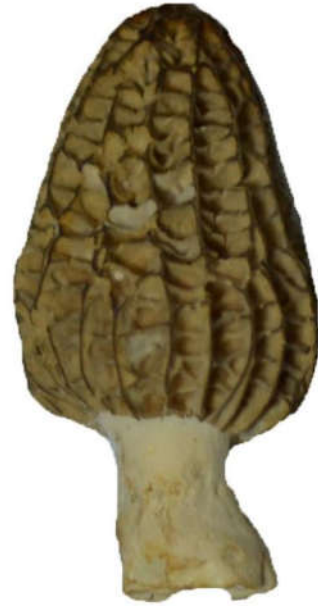

**Figure S2.** The picture of *Morchella* mycelium and strain.

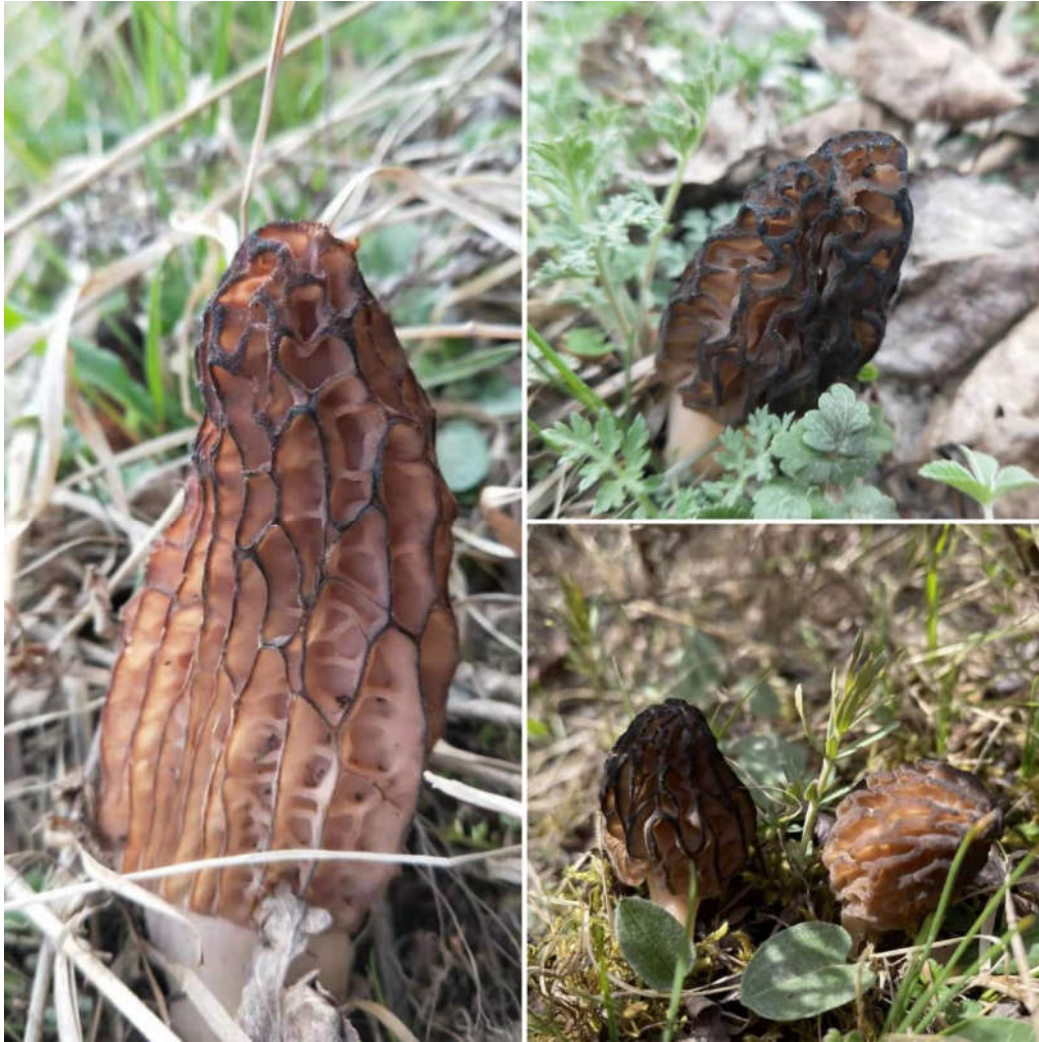

**Figure S3** The image of wild morels habitat.
